# Supplementary material for: Highly efficient green phosphorescent OLEDs based on a novel iridium complex
Source: Royal Society of Chemistry journal article supplement (doi:10.1039/c2tc00052k), 2012-11-01
Supplement: c2tc00052k.pdf [file c2tc00052k.pdf]

## Supporting Information

# Highly efficient green phosphorescent OLEDs based on a novel iridium 5 complex

Hong-Yan Li,<sup>a</sup> Liang Zhou,<sup>b</sup> Ming-Yu Teng,<sup>a</sup> Qiu-Lei Xu,<sup>a</sup> Chen Lin,<sup>a</sup> You-Xuan Zheng,<sup>a,\*</sup> Jing-Lin Zuo,<sup>a</sup>  
Hong-Jie Zhang,<sup>b</sup> Xiao-Zeng You<sup>a</sup>

*a: State Key Laboratory of Coordination Chemistry, Nanjing National Laboratory of Microstructures, Center for  
10 Molecular Organic Chemistry, School of Chemistry and Chemical Engineering, Nanjing University, Nanjing  
210093, P. R. China, e-mail: yxzheng@nju.edu.cn,*

*b: State Key Laboratory of Rare Earth Resource Utilization, Changchun Institute of Applied Chemistry, Chinese  
Academy of Sciences, Changchun, 130022, P. R. China*

|    |                                                                    |     |
|----|--------------------------------------------------------------------|-----|
| 15 | 1. Fig. S1 TGA of the compounds <b>1</b>                           | S-2 |
|    | 2. Fig. S2 DSC of the compounds <b>1</b>                           | S-3 |
|    | 3. Fig. S3 Lifetime's measurement of the compounds <b>1</b>        | S-4 |
|    | 4. Fig. S4 Cyclovoltammety (CV) diagrams of the compounds <b>1</b> | S-5 |

20

25

30

35

## 1. TGA of the compounds 1.

5

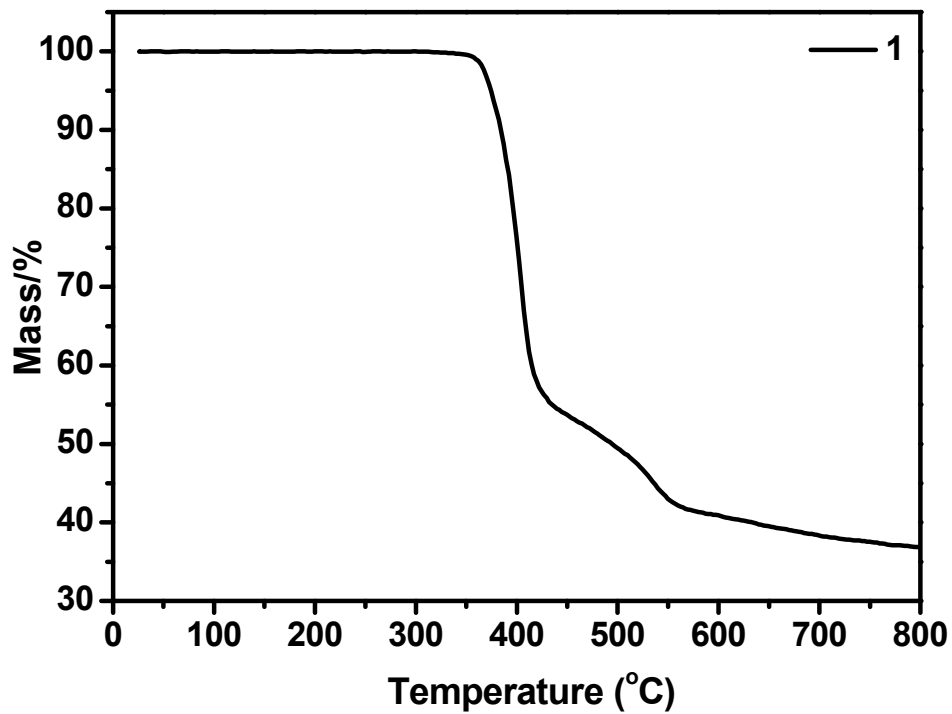

Fig. S1 TGA thermograms of 1.

10

15

20

## 2. DSC of the compounds 1.

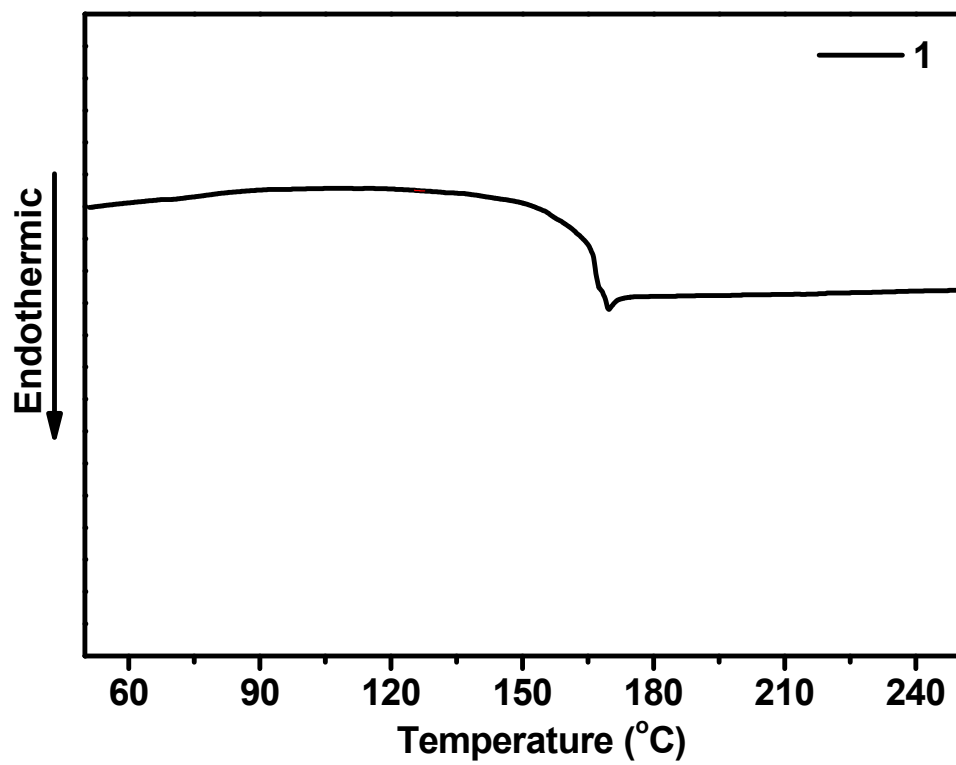

5

Fig. S2 DSC thermograms of 1.

10

15

20

### 3. Lifetime's measurement of Ir(tfmppy)<sub>2</sub>(tfmtpip).

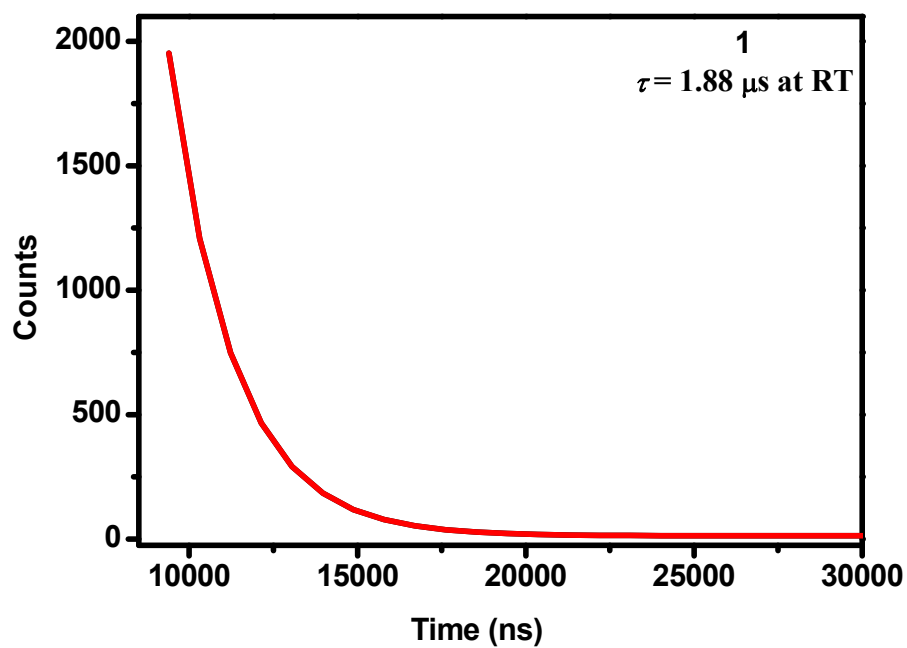

5

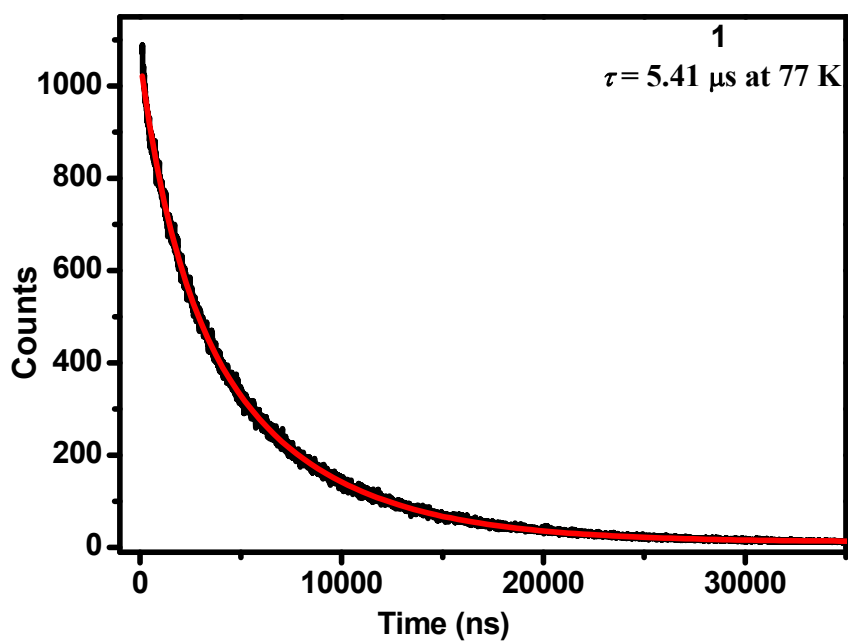

**Fig. S3** Lifetimes of **1** in degassed toluene solution at room temperature and in deaerated toluene glass at 77 K.

10

#### 4. Cyclovoltammety (CV) diagrams of the compound 1.

5

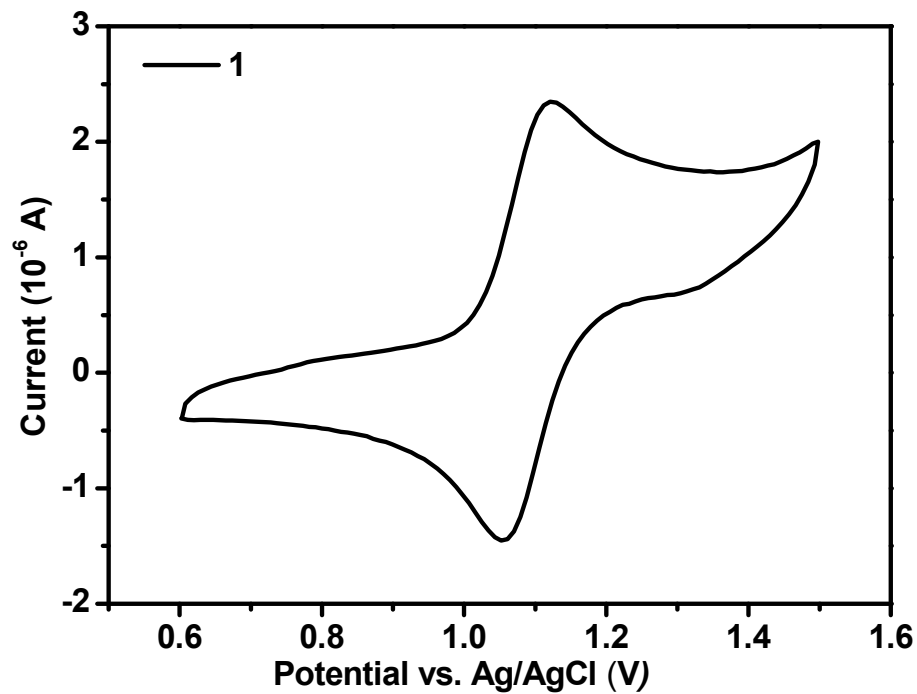

Fig. S4 Cyclovoltammety (CV) diagrams of 1 in degassed  $\text{CH}_2\text{Cl}_2$  solutions.

10

15

20
